# Supplementary material for: The repetitive DNA sequence landscape and DNA methylation in chromosomes of an apomictic tropical forage grass, Cenchrus ciliaris
Source: PubMed Central journal article supplement (PMC9521199; doi:10.3389/fpls.2022.952968), 2022-09-15
Supplement: Table_1.pdf [file Table_1.pdf]

**Supplementary Data Table S1.** List of the most abundant clusters extracted from the Chinese variety of *Cenchrus ciliaris* SRR8666664 using RepeatExplorer.

| Name      | Length [bp] | GC [%] | Sequence                                                                                                                                                                                                                                                                                                                                                                                                                                                                                                                                                                                                                                                                                                                                                                                                                                                                                                                                                                                                                                                                                                                                                                                                                                                                                                                                                                                                                                                                                                                                                                                                                                                                        | Description                                                                                                    |
|-----------|-------------|--------|---------------------------------------------------------------------------------------------------------------------------------------------------------------------------------------------------------------------------------------------------------------------------------------------------------------------------------------------------------------------------------------------------------------------------------------------------------------------------------------------------------------------------------------------------------------------------------------------------------------------------------------------------------------------------------------------------------------------------------------------------------------------------------------------------------------------------------------------------------------------------------------------------------------------------------------------------------------------------------------------------------------------------------------------------------------------------------------------------------------------------------------------------------------------------------------------------------------------------------------------------------------------------------------------------------------------------------------------------------------------------------------------------------------------------------------------------------------------------------------------------------------------------------------------------------------------------------------------------------------------------------------------------------------------------------|----------------------------------------------------------------------------------------------------------------|
| Cluster1  | 140         | 45.7   | GAAACCATTTTCACAACTTCGGTACCCTGATGTAGTGCATTCATGCACGAAACAC<br>AAGTTCTTCTCGTTTGACGTGCCGAAGGTTCTTCCAAATGCTCCTAAACACTCTCA<br>AACATCGTTTGGGATCTAATGGGGTAGGC                                                                                                                                                                                                                                                                                                                                                                                                                                                                                                                                                                                                                                                                                                                                                                                                                                                                                                                                                                                                                                                                                                                                                                                                                                                                                                                                                                                                                                                                                                                            | Labelled oligonucleotide probes ordered are from 44bp (5 to 48; 46.7% GC) and RC of 45bp (96 to 140; 46.7% GC) |
| Cluster58 | 1326        | 47.4   | GGGCCCTTGCCCTAAGAAGCGCCTTCCCGAGATCGGACTCGAGGGAAGGTAAGA<br>CATCCCGCCGGGATGCCAGTTACTTTATAGGTAGAAAAGAAGAGATTCAATAG<br>TAGAATATATTAGTTCTCTGTTTCATAGGTTCAATCATAGTAGAATCCCCCTCCG<br>GGCGAGGGCTCGGCTCACTCTGCTCTGCTTCCGGGAAAGGTATGGAAGTATGATG<br>TTCTCTAGTCCGGATTTCCCGGAAGCAGAGCGCCTCATCCGAATTTACATACTA<br>CCTTTACTTTCTGAGCCCGTTCGGGTCCGGAAAGCTAAATCGGAGTAGTAAAT<br>TCTTTATTTGTTGTGGGGGGCGCCCCAGGGGGCTGGGGGCGATAAGTAGTAGGT<br>TGAGCCTCTGAAAACCTTTTATAGTTGGCTCAACCATTCACAACTTTTGGAAAGG<br>GGTCGCAGGGGAAAACCTTTTAAGCTTCCCTTGAAGTCAATTTCCAGTTTGA<br>ACAAAAGTGGAAATTACATCATCCGAAAAAATCGCGCGATTTTTTCGATTCCATA<br>CCTTTAAAATGTAACCCCGTGAAGGGCCCTTTCCCGTATAGCGTCGCGTCTGTTT<br>GCTGTGCGCAGGACGAACCCCTTAGGATCCGCCAGTGGTGTCTTCCGCCTAGC<br>TGAGGGCAGATCTCTCTTTGGAAGATCGACCACAATCTGCGCCTTCTGTCTT<br>TGTAAGTCTATAGCCTTATCTTGCCAGGGAATGTTTCCCTCGATCGAGGA<br>AATGGGCCGTATCCCCAGGGGATGATTTCCGAGAGGTTCTTATGGCGCTTCTA<br>AGCTAGACAATCGGCAAAGAAAAGGGACACCTTGCCAGTCTGGAGGTTGTAA<br>TTCCAAGGCCACGCATCTCAGAAGGGAGTCAACCCATCCCGTGGGTTATTCACG<br>GTTTTCGAAGTTGGTGGCTAGCACTGATACATGGCATCCCTCTTGTCAAGGAACA<br>ACTACTGTTGTGACAAAGGTTTCGACAGATCATTTTATGTCATTCTTCAGGGAGGT<br>TCGTGATAAATCCGATCTGAAAAGTTTCTTTTCATCGATTTATTGGCTTTTCGTC<br>TATCCATTGCCAGTTTCCGGTGAATTTGATTTTCAAAATGGTTAAACCGCTGGAA<br>AATGCCCTTGAATTCGGGATAACATGGTACGGTATTAGTAAATAAGGAAATAAA<br>TAAAAGTATCCGACCTTTGGGAGGAATTCCAATTAATACAAACCATCCCTCCGGG<br>ATGCCAACCCGATTTATCGAGGATTTCCCTTGATAAATCGAATACAATACCCCAT<br>TGGTATG                                                                                                                                                                                                                           | Labelled oligonucleotide probe ordered is from 44bp (867 to 910; 54.5% GC)                                     |
| Cluster22 | 4807        | 45.6   | ACTTGCTAGATTCCAATAATATGAGTACCCTTTGGACTTTTTGGAGATTTTATG<br>CCAAAGGGGGAGAGATAGTGGAGAGATCGTGGAGATTGGAGTCAAAGCAAGGC<br>AAGCATGGAGTAAAGGGGAGTGATCGGGGAGAGATCCAAGCAAGGGGGAGTAT<br>GATCTAGGGGGAGTTGGATGATGGTAAGCATCCAAGCAAGTGAAGTGTTCAA<br>TTTTGTCAATTTCTGCAAAATTATGCTTGGCTTTGATTGTTGTCATAAATACCA<br>AAAAGGGGGAGATTGTAGCGAACATGGCCTCAAAGCCAAAAGTTCGAGTATGAT<br>TTCGGTGATTATGACAACATGGTCAATGGGACTAATAGTATTGTTGAGCATGTC<br>CTTGTAGGCATTTATAGGTCCCATGGATGTAACCACAATCAAAGCCAAAATACCA<br>CATCCAAAATCCAGAAGATAGTCTATTTTTCAAGGTAATAAACAGTGGTAAAG<br>ATGGCTCCAAGAGGTGGCAAGTTGAACCAAAGCAAAAACAAGCAAAACCTCAGA<br>AGTTAGTAGCGTCGGATAAACCGACGCTATGTCCCCAGAGGGCTCGGAGCAAT<br>CGCCGGACGAATTGGTGCCTGGCGTGAAGGCTGAAATGAAGATGACACCGTCCG<br>GATGTTCCGACGGTCTGTTCTAGTTGCGTCCGACGAATTCCTGATTCAAGGCT<br>GTGATGCAGAAAGCATCGGATTATCCGACGCTTGTAGCGTCCGCTATCCGATAA<br>TATTTTTGTCCAAGGCCGAGAGCAAGGGTTTCAGGAACCCCTTCAGCACCGGAAG<br>ATCCGACGCCCCGTCGGTGAAGCGTCCGAGCAATTCTGTGAGAAGTCCAACG<br>GCTAGTTCAAAAAGACAGTAGCACCGGATGAACCGACGGTGAAGAAAAGGCAG<br>CGTCGGACAAAGCGTCCGACAGATTGCGTCAGCAGATCGCAACGGCTAGGTGAC<br>GTGGAAGGGGCACCGGATAAACCGACGGTCCAAAAGGGAGGGCTCGGAATAT<br>CCGATGGTATACTTTTACAGCAGCTTTTAGCCAACGGCTAGTTTGTGCTTGGGCT<br>ATATATACCCCTTCCACCCGGTCAATTTGAGTGTGCTGGATTGAGGAGAAGTGCAG<br>AGGAGTCCAAGACACATTGAAGACCATCTCCAATCCATCCAAGTGTAAATTGCT<br>CATTCAATAGGCTTTGCACATGCTTAGAGTGTGTGTTGCTTGGCTTAGGCTTAGTG<br>CTGAGTGTGAGGCAAGGTGTAGCTGCCTTGTGAGGTGATTCTCGAGTGAATCAAG<br>GTGTACAAGGTGTGCCGGAGCCTTGGGGCCTAGGTGGCTCTCCGGCAATCGTCTT<br>CGACCTCCGACTTGGTGTGGTGCGGCGAAGACACTTTGTGCGAGGGACGTGGA<br>GACCCTCTCTTGGTGGAGAAGCTCCTTAGTGGAGGCGGCATCAAGGTGACCAA<br>GGGCGGCTTGGCGTGGCGAGCCTTTGTGGCGAGTCAAGTGGCGGGCTCGTTGGG | Labelled oligonucleotide probe designed to RNaseH domain (RC) is from 51bp (2156 to 2206; 43.1% GC)            |

|  |  |                                                                                                                                                                                                                                                                                                                                                                                                                                                                                                                                                                                                                                                                                                                                                                                                                                                                                                                                                                                                                                                                                                                                                                                                                                                                                                                                                                                                                                                                                                                                                                                                                                                                                                                                                                                                                                                                                                                                                                                                                                                                                                                                                                                                                                                                                                                                                                                                                                                                                                                                                                                                                                                                                                                                                                                                                                                                                                                                                                                                                                                                                                                                                                                                                                                                                                                                                                                                                                                                                                                                                                                                                                                              |  |
|--|--|--------------------------------------------------------------------------------------------------------------------------------------------------------------------------------------------------------------------------------------------------------------------------------------------------------------------------------------------------------------------------------------------------------------------------------------------------------------------------------------------------------------------------------------------------------------------------------------------------------------------------------------------------------------------------------------------------------------------------------------------------------------------------------------------------------------------------------------------------------------------------------------------------------------------------------------------------------------------------------------------------------------------------------------------------------------------------------------------------------------------------------------------------------------------------------------------------------------------------------------------------------------------------------------------------------------------------------------------------------------------------------------------------------------------------------------------------------------------------------------------------------------------------------------------------------------------------------------------------------------------------------------------------------------------------------------------------------------------------------------------------------------------------------------------------------------------------------------------------------------------------------------------------------------------------------------------------------------------------------------------------------------------------------------------------------------------------------------------------------------------------------------------------------------------------------------------------------------------------------------------------------------------------------------------------------------------------------------------------------------------------------------------------------------------------------------------------------------------------------------------------------------------------------------------------------------------------------------------------------------------------------------------------------------------------------------------------------------------------------------------------------------------------------------------------------------------------------------------------------------------------------------------------------------------------------------------------------------------------------------------------------------------------------------------------------------------------------------------------------------------------------------------------------------------------------------------------------------------------------------------------------------------------------------------------------------------------------------------------------------------------------------------------------------------------------------------------------------------------------------------------------------------------------------------------------------------------------------------------------------------------------------------------------------|--|
|  |  | <p>AGAGACTTGGTGACCGGGAAGCAATACTCTTGTGTGAGTGCTTCAACAACGTGG<br/>ACTAGGGGTGGCTAAGTGCCTACCGATACCACGGGATAAATCGCGTGTCAAGAG<br/>TTTGCTFCCTCATCCCTATTTACGTTTCCGCATTACTTTCTTGAATCCTTGT<br/>GCCTTACCTTCCCTAGAGTAGTATCTTGTAGGATTGGCTATAGGTTGCAAACTT<br/>GTTTTGGGATGAGGGTGTCACTAGATCAACCGTAGATTGCACATCTAGATAGA<br/>AATGATCTAGTTTACTATATGCAAAGTAGAGGAAACCATAGGTTAAGTTTTAAG<br/>TTGCCTAATTCACCCCTCCCTCTTAGGCTACGAGCATCCGATCCTTACAAGTG<br/>GTATCAGAGCCGGGACTCACATCTTTCGCAAGATACGCCAATTCATTGGCAAAT<br/>TGTGAAACCGGCTCATTTGATCGGTTAGGCTTACCGCCTAGTGAGTTGCTCTAA<br/>AGGGGAAAGGGATGGATCATCAAATAGGTTTCCCTCCTCCACATTTGATGGCAC<br/>GGGCTATCCACGTTGGAAAGTTCTCATGGAAGCTTACCTCCAAGCAAAGGGCCTA<br/>AATGTTTGGAGGGTCACTAATGAAGGGGTTAGAAAATAGGACCCAACAAGAAAA<br/>CAATATGATGTAACCGCGAGGAGCATCCTTTTGTCTCTCTTAGTGAAGATGTTTT<br/>TCATAGAGTTTTTACTTGTGAAAATGCTCATGAGCTATGGAAAATCAAAAGAG<br/>AATAATGAGGGTTCAAAAGATGTTTCCAATGAACGTTACGAGTTGCTCTTTGAGG<br/>GTTTTACTAGCTTAAAGCAACTTGAGGATGAAAATGTGCAATCTATGTACTACG<br/>CCTAAATGTGCTTGTCAATGAGATTAATGCTTTAGGTGTGAAAGAAAATGGGGAC<br/>ATTGAGATCGTCCGCAAGATGCTTCAAAGTCTTCGGAAGCCCGACTATGACTTGG<br/>TGAAGTCCATCATCTACGAGAAGAAGCTTGAAGAGCTAACACCACAACAAGTGT<br/>TGTGCAAGATCATGGCTCAGAGCTTCAATCATGCCAAGTCAAAGAAGGGCGC<br/>CCCAAGAGAAGCCAAAGAAAAGCCTCAAGAACCATCTTCTCAACTACAAGCC<br/>AAGCTTTCTCAAGCCAACAAGAAAAGAGATGAGGAAGATGGCGCTTCATGGAA<br/>GCTCAAGTGAAGATGATGATGACTCCTCAAGTGAAGGAGACCGAGGAAA<br/>TGGTGGCCATGTACATGAAGAAGGCTTTCAAGTATGTGAAGAAGATCAACATGT<br/>ACGGCTACAACGTCCACTTGAGAGAAGGGCGTCCATCAACATATCAAGGTCA<br/>CCAAGATCAAGCACAAAACCAAGAAGAAGGTGGTCAAGGAGAGGAAGCCAAAG<br/>AAAGAAGCACTACCGCCGTCGCGAGTGGATAAGTGGTGGAGAATCAAGTTCT<br/>TGTAGCTCAAGTGAATCAAGCAAGAAGTTCACCACCCGCTTCATGCAAGGTC<br/>CTTCATCATCATCCACATGTGCCTTATGGCCAAAGGTATGGAAAGCGATGTAAG<br/>TGATGATGAATCCGACACCCTCTATTGATGATCTTGTGAGCTAGTCCATGAG<br/>CAAAAAGGAATCCTTGAAAAACAAGCTAATGAAATCAAAGAAGTCAATGTCTC<br/>AATGACCTTAGTGCTATCCTTGTACAAAATATGAAGATTTGTTGCGCAAAATCA<br/>ATTTGCTTTGCAAGGAGCGCAATGAGCTAAAAATCTAAGTTAGAGAGCAATGAGA<br/>TTAAAATAAAGATTCCTTTGAGCTTATTGAATCATCTATCCCTTGTGCAATTCCT<br/>ATCTCCAAGGTAGATGCTTCAACTTCTGCATTGATTTAATTGATGAATCTTGCTC<br/>ACACTTTGCTATGAGAATGTTGTAGTAGAAAAGTGTGATGATCTCATTAGCAAG<br/>GAGAATGATGAGCTCAAGCGAGAAGTGGACATGCTTCGAGTGAAGTTGGCAAGG<br/>TTGATGGCAAGAGCGAGGACAAGGAGGAACAAGAGGAAGTCCCTCAAGACAT<br/>GAAGAGCAACGTCCAACCTTCTCAAGATAACCGTGATCACATGGTGAAGAAGCT<br/>TGAGAAGGGTGAACCGTGACTTGCTACAAGTGTATGAAGAAGGGCACAAGTT<br/>CTACAAAATGCCCTCAATTCAAGAAGATGGGCAAGGGCGAGAGAAAAGAAGATGA<br/>ACCCCTCCATCAAGAGCTCCCTCATCTACACCAAGCCCAACCGCAAGAACAAGA<br/>GCAAGAGCAACACCTATGTCATCAAGAAGAAGGCAAATGGCAAGGTGGTTGCAC<br/>ACAAGGTTGGGAAGATGAAGACGGAGCGAGGTTGGAGCCAACCTATTTGGGTGC<br/>CTAAGGAAGTCATCACAACATGAAGGGCCCCAAAAGGTTTGGGTTCCAATCA<br/>CCAAGTGAAGGCCATGAACGGCTACGGGGACTTGGGAGGCTTGGCACAAGAAG<br/>ATGTGAAGTTTCAAGTCAAGAAGCCAAGCTTGAAGATTGGACATGTGTTGCCCA<br/>AGTTCCCGGTTAAGGTAATGGTAGCAAGAACCCTCTCTTGTATCATTGTAGCT<br/>CCATTGCCCTTGTAGGTTTGCATTAGTTGTCATGCCTAGTTGTTACATATGGTA<br/>GGTTGCTTGTATCTTGTGCTAACCCATGAGCAACCTACATGTTTTGCCATGTGT<br/>GTAGGAAATCTACACTTTGTTCTTTCATGGTGCATGCATTTCTTATGTTATCCTTT<br/>GCATCATGAGCAAGCTATAGAATTAGCTTCCCTTTTGTATCACAAACAATGTGC<br/>ATACATTTGGTTGGTATCAAACACCTAATGCACACATATAGGGGGAGCTCATT<br/>CTATAGTTGGTTATGGGACTAACATTTGTTCAAGCTTATTGTGTAGTCCCTTG<br/>GCGACGCGTTCCGGTGGGCTTCAATCTAAGAGAATGCTATTTCACTCTCAAT<br/>GTGATCTAACATCTCTATAAGAGTGAATATAGCAATATGAGCTTCATGTATTGA<br/>GTCATGTCCTTGGGAGCTTATGTCTCTATATAAGTTCAAAAGGCAATGTACTCATA<br/>CATTCTAATCCTTTTGGTACCTAATGTGTTCTCTTTGCAAGCCTCTCCAAGTG<br/>GTGTCATCTCCAAGTGAATCATTTCCAAGTGGCTCATCTCAATGTGGTGGCAAC<br/>AAGGTAGAGAGGAAAACCCCGGAGGAATGCTATGCTCAAATTTCTACAAGTGG</p> |  |
|--|--|--------------------------------------------------------------------------------------------------------------------------------------------------------------------------------------------------------------------------------------------------------------------------------------------------------------------------------------------------------------------------------------------------------------------------------------------------------------------------------------------------------------------------------------------------------------------------------------------------------------------------------------------------------------------------------------------------------------------------------------------------------------------------------------------------------------------------------------------------------------------------------------------------------------------------------------------------------------------------------------------------------------------------------------------------------------------------------------------------------------------------------------------------------------------------------------------------------------------------------------------------------------------------------------------------------------------------------------------------------------------------------------------------------------------------------------------------------------------------------------------------------------------------------------------------------------------------------------------------------------------------------------------------------------------------------------------------------------------------------------------------------------------------------------------------------------------------------------------------------------------------------------------------------------------------------------------------------------------------------------------------------------------------------------------------------------------------------------------------------------------------------------------------------------------------------------------------------------------------------------------------------------------------------------------------------------------------------------------------------------------------------------------------------------------------------------------------------------------------------------------------------------------------------------------------------------------------------------------------------------------------------------------------------------------------------------------------------------------------------------------------------------------------------------------------------------------------------------------------------------------------------------------------------------------------------------------------------------------------------------------------------------------------------------------------------------------------------------------------------------------------------------------------------------------------------------------------------------------------------------------------------------------------------------------------------------------------------------------------------------------------------------------------------------------------------------------------------------------------------------------------------------------------------------------------------------------------------------------------------------------------------------------------------------|--|
